# Supplementary material for: Research on a Fast Human‐Detection Algorithm for Unmanned Surveillance Area in Bulk Ports
Source: Hindawi journal article supplement (doi:10.1155/2014/386764), 2014-01-01
Supplement: f1 [file 386764.f1.zip]

Archive with 7 entries (6 files):
- 386764.f1/
- 386764.f1/Experimental Results 1.jpg
- 386764.f1/Experimental Results 2.jpg
- 386764.f1/Experimental Results 3.jpg
- 386764.f1/Field Experiemtnal Video.mp4
- 386764.f1/mat.386764.v2.mp4
- 386764.f1/Readme of Field Experiemtnal Video.txt
