# Supplementary material for: Research on a Fast Human‐Detection Algorithm for Unmanned Surveillance Area in Bulk Ports
Source: Hindawi journal article supplement (doi:10.1155/2014/386764), 2014-01-01
Supplement: f1 [file 386764.f1.zip › 386764.f1/Readme of Field Experiemtnal Video.txt]

This video was recorded in Tianjin Port Coal Terminal recently. 
This video shows that a worker was captured by our software with a fast human detection algorithm if he came into the unmanned field. 
Our algorithm is only sensitive for human. 
Around of the 15s of the video, a truck came into the field but our software did not captured it.
