# Supplementary figures and images for: Research on a Fast Human‐Detection Algorithm for Unmanned Surveillance Area in Bulk Ports
Source: Hindawi journal article supplement (doi:10.1155/2014/386764), 2014-01-01

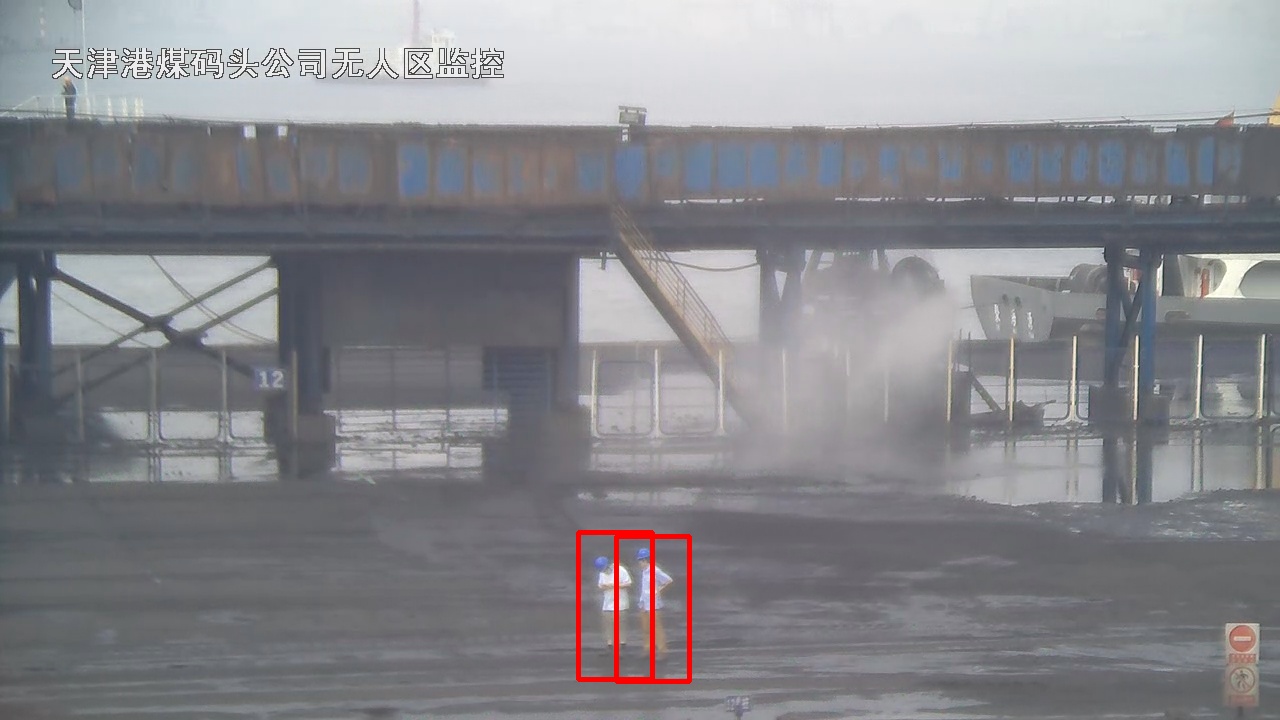

Supplement: f1 [file 386764.f1.zip › 386764.f1/Experimental Results 1.jpg]

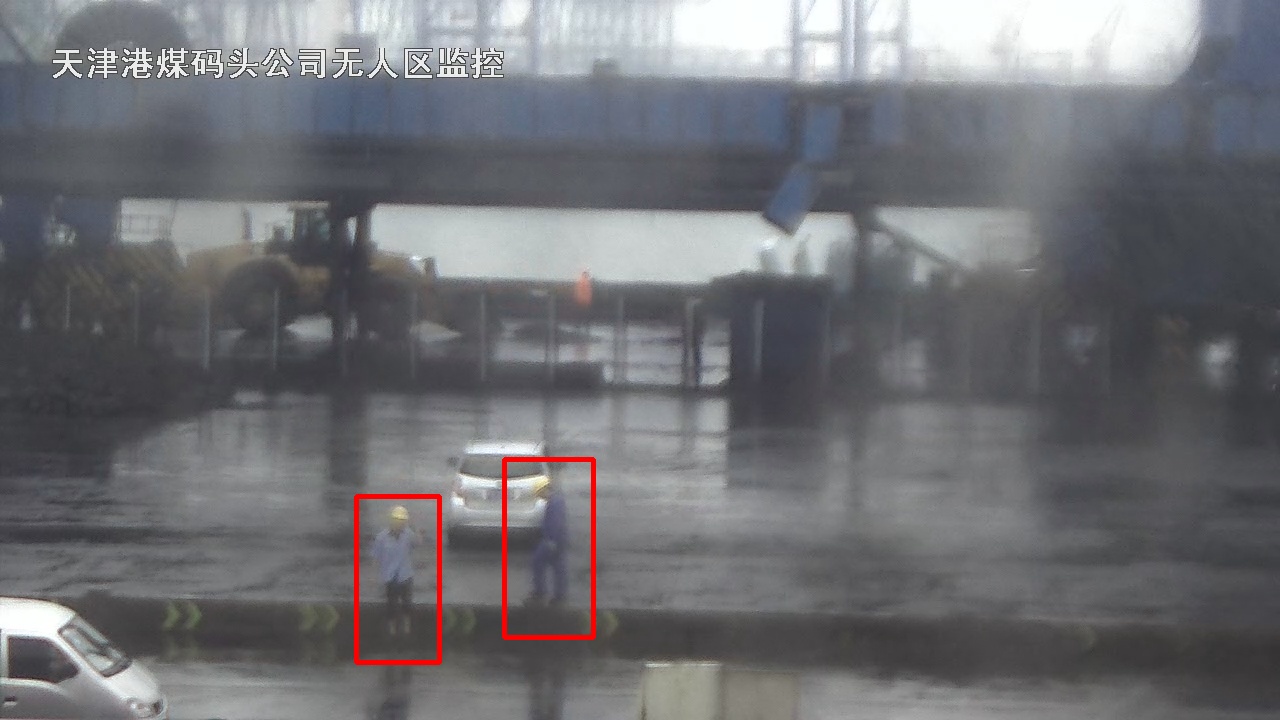

Supplement: f1 [file 386764.f1.zip › 386764.f1/Experimental Results 2.jpg]

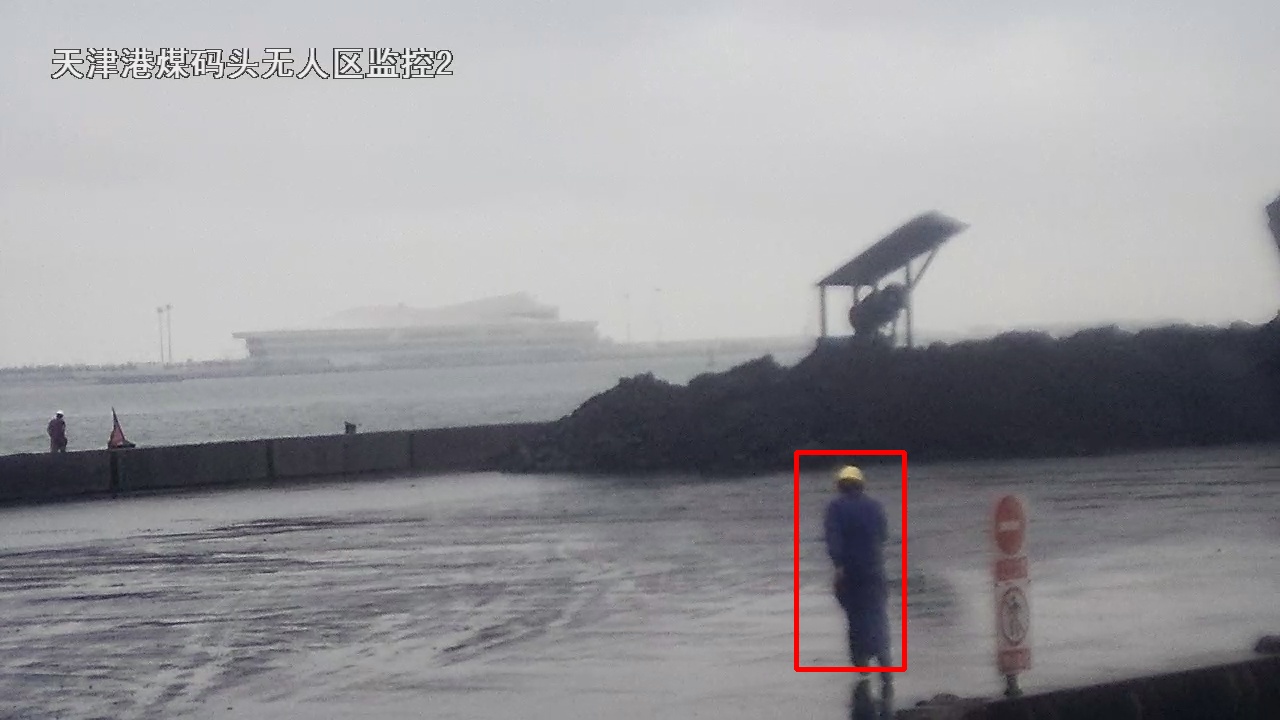

Supplement: f1 [file 386764.f1.zip › 386764.f1/Experimental Results 3.jpg]
